# Supplementary material
Source: publisher site journal article supplement (https://www.dovepress.com/article/261781)
Supplement: Supplementary file 1 [file get_supplementary_file.php]

Supplementary table Symptom manifestations in IHPRF1 patients

| Family                      | Current report            | Gal et al. |                                         |                             |            | Al Sayed et al.                |                          |                                            |                                            |                          |                                      | Koroglu et al.                                                             |            |                              |            | Bramswig et al.                                          |                |                              |        |                                |        |                                                                     |            |                           |            | Takenouchi et al.       |            |                               |                   | Campbell et al.           |                               | Angus et al. |                           |                           | Bourque et al.           |          |             |          |                                      |  |                                                                     |  |                                                                                      |  |                                                                                      |  |                           |
|-----------------------------|---------------------------|------------|-----------------------------------------|-----------------------------|------------|--------------------------------|--------------------------|--------------------------------------------|--------------------------------------------|--------------------------|--------------------------------------|----------------------------------------------------------------------------|------------|------------------------------|------------|----------------------------------------------------------|----------------|------------------------------|--------|--------------------------------|--------|---------------------------------------------------------------------|------------|---------------------------|------------|-------------------------|------------|-------------------------------|-------------------|---------------------------|-------------------------------|--------------|---------------------------|---------------------------|--------------------------|----------|-------------|----------|--------------------------------------|--|---------------------------------------------------------------------|--|--------------------------------------------------------------------------------------|--|--------------------------------------------------------------------------------------|--|---------------------------|
|                             | Patient                   | Family 1   |                                         | Family 1                    |            | Family 1                       |                          | Family 2                                   |                                            | Family 2                 |                                      | Family 2                                                                   |            | Family 3                     |            | Family 4                                                 |                | Family 5                     |        | Family 6                       |        | Family 7                                                            |            | Family 8                  |            | Family 9                |            | Family 10                     |                   | Family 11                 |                               | Family 12    |                           | Family 1                  |                          | Family 2 | Family 1    | Family 1 |                                      |  |                                                                     |  |                                                                                      |  |                                                                                      |  |                           |
|                             | Sex                       | Female     | Male                                    | Female                      | Male       | Female                         | Male                     | Female                                     | Male                                       | Female                   | Male                                 | Female                                                                     | Male       | Female                       | Male       | Female                                                   | Male           | Female                       | Male   | Female                         | Male   | Female                                                              | Male       | Female                    | Male       | Female                  | Male       | Female                        | Male              | Female                    | Male                          | Female       | Male                      | Female                    | Male                     | Female   | Male        | Female   | Male                                 |  |                                                                     |  |                                                                                      |  |                                                                                      |  |                           |
| Hypotonia*                  | Severe                    | Severe     | Severe                                  | Severe                      | Severe     | Severe                         | Mild (improved with age) | Mild (improved with age)                   | Mild (improved with age)                   | Severe                   | Severe                               | Mild                                                                       | Mild       | Mild                         | Mild       | Mild                                                     | Moderate       | Severe                       | Severe | Severe                         | Severe | Severe                                                              | Moderate   | +                         | +          | Severe                  | Severe     | Mild                          | Mild              | Mild                      | Mild                          | Mild         | Mild                      | Mild                      | Mild                     | Mild     | Mild        | Severe   |                                      |  |                                                                     |  |                                                                                      |  |                                                                                      |  |                           |
| Vision                      | Strabismus                | Strabismus | Strabismus, Nystagmus                   | Strabismus, Ophthalmoplegia | Strabismus | Anisometropia                  | Normal                   | Normal                                     | Normal                                     | Strabismus               | Strabismus, Nystagmus, Optic atrophy | Strabismus, Nystagmus, Optic atrophy                                       | Strabismus | Strabismus                   | Strabismus | Strabismus                                               | Strabismus     | Strabismus                   | Normal | Normal                         | Normal | Strabismus                                                          | Strabismus | Strabismus                | Strabismus | Strabismus              | Strabismus | Esotropia                     | Esotropia, Myopia | Strabismus, Hypermetropia | Strabismus, Hypermetropia     | Normal       | Strabismus, Hypermetropia | Strabismus, Hypermetropia | Strabismus, Nystagmus    |          |             |          |                                      |  |                                                                     |  |                                                                                      |  |                                                                                      |  |                           |
| Eye Contact                 | Poor                      | NA         | Absent                                  | Present                     | NA         | NA                             | NA                       | Delayed                                    | NA                                         | NA                       | Absent                               | Absent                                                                     | NA         | NA                           | NA         | NA                                                       | NA             | Present                      | Poor   | NA                             | NA     | NA                                                                  | NA         | NA                        | NA         | NA                      | NA         | NA                            | NA                | NA                        | NA                            | NA           | NA                        | NA                        | NA                       | NA       | NA          | NA       |                                      |  |                                                                     |  |                                                                                      |  |                                                                                      |  |                           |
| Speech Development          | +                         | NA         | NA                                      | Delayed                     | NA         | NA                             | NA                       | Delayed                                    | NA                                         | NA                       | NA                                   | NA                                                                         | NA         | NA                           | NA         | NA                                                       | Mildly delayed | Delayed                      | NA     | NA                             | NA     | NA                                                                  | NA         | NA                        | NA         | NA                      | NA         | NA                            | NA                | NA                        | NA                            | NA           | NA                        | NA                        | NA                       | NA       | NA          | NA       |                                      |  |                                                                     |  |                                                                                      |  |                                                                                      |  |                           |
| Scapula                     | +                         | NA         | NA                                      | +                           | NA         | NA                             | NA                       | +                                          | NA                                         | NA                       | NA                                   | NA                                                                         | NA         | NA                           | NA         | NA                                                       | +              | +                            | +      | +                              | +      | +                                                                   | +          | +                         | +          | +                       | +          | +                             | +                 | +                         | +                             | +            | +                         | +                         | +                        | +        | +           | +        | +                                    |  |                                                                     |  |                                                                                      |  |                                                                                      |  |                           |
| Constipation                | +                         | +          | +                                       | +                           | +          | +                              | +                        | +                                          | +                                          | +                        | +                                    | +                                                                          | +          | +                            | +          | +                                                        | +              | +                            | +      | +                              | +      | +                                                                   | +          | +                         | +          | +                       | +          | +                             | +                 | +                         | +                             | +            | +                         | +                         | +                        | +        | +           | +        | +                                    |  |                                                                     |  |                                                                                      |  |                                                                                      |  |                           |
| Muscle Wasting              | +                         | +          | +                                       | +                           | +          | +                              | +                        | +                                          | +                                          | +                        | +                                    | +                                                                          | +          | +                            | +          | +                                                        | +              | +                            | +      | +                              | +      | +                                                                   | +          | +                         | +          | +                       | +          | +                             | +                 | +                         | +                             | +            | +                         | +                         | +                        | +        | +           | +        | +                                    |  |                                                                     |  |                                                                                      |  |                                                                                      |  |                           |
| Seizure                     | -                         | -          | +                                       | +                           | +          | +                              | +                        | +                                          | +                                          | +                        | +                                    | +                                                                          | +          | +                            | +          | +                                                        | +              | +                            | +      | +                              | +      | +                                                                   | +          | +                         | +          | +                       | +          | +                             | +                 | +                         | +                             | +            | +                         | +                         | +                        | +        | +           | +        |                                      |  |                                                                     |  |                                                                                      |  |                                                                                      |  |                           |
| Sleep Disturbance           | +                         | NA         | NA                                      | NA                          | NA         | NA                             | NA                       | NA                                         | NA                                         | NA                       | NA                                   | NA                                                                         | NA         | NA                           | NA         | NA                                                       | NA             | +                            | +      | +                              | +      | +                                                                   | +          | +                         | +          | +                       | +          | +                             | +                 | +                         | +                             | +            | +                         | +                         | +                        | +        | +           | +        | +                                    |  |                                                                     |  |                                                                                      |  |                                                                                      |  |                           |
| Cardiovascular Malformation | ASD,TR                    | NA         | NA                                      | NA                          | NA         | NA                             | NA                       | NA                                         | NA                                         | NA                       | NA                                   | NA                                                                         | NA         | NA                           | NA         | NA                                                       | NA             | NA                           | NA     | NA                             | NA     | NA                                                                  | NA         | NA                        | NA         | NA                      | NA         | NA                            | NA                | ASD                       | NA                            | NA           | NA                        | NA                        | NA                       | NA       | NA          | NA       |                                      |  |                                                                     |  |                                                                                      |  |                                                                                      |  |                           |
| Recurrent Infection         | +                         | NA         | NA                                      | +                           | +          | +                              | +                        | +                                          | +                                          | +                        | +                                    | +                                                                          | +          | +                            | +          | +                                                        | +              | +                            | +      | +                              | +      | +                                                                   | +          | +                         | +          | +                       | +          | +                             | +                 | +                         | +                             | +            | +                         | +                         | +                        | +        | +           | +        | +                                    |  |                                                                     |  |                                                                                      |  |                                                                                      |  |                           |
| Breathing                   | Abnormal                  | Normal     | Abnormal                                | Abnormal                    | NA         | NA                             | NA                       | NA                                         | NA                                         | NA                       | NA                                   | NA                                                                         | NA         | NA                           | NA         | NA                                                       | NA             | NA                           | NA     | NA                             | NA     | NA                                                                  | NA         | NA                        | NA         | NA                      | NA         | NA                            | NA                | NA                        | NA                            | NA           | NA                        | NA                        | NA                       | NA       | NA          | NA       | NA                                   |  |                                                                     |  |                                                                                      |  |                                                                                      |  |                           |
| Neuroimaging                | Frontal lobe atrophy      | Normal     | High intensity foci on dorsal brainstem | Normal                      | Normal     | Normal                         | Normal                   | Normal                                     | Normal                                     | Normal                   | Normal                               | Cerebellar atrophy                                                         | Normal     | Normal                       | Normal     | Normal                                                   | Normal         | Normal                       | Normal | Normal                         | Normal | Normal                                                              | Normal     | Normal                    | Normal     | Normal                  | Normal     | Normal                        | Normal            | Normal                    | Normal                        | Normal       | Normal                    | Normal                    | Normal                   | Normal   | Normal      | Normal   | Normal                               |  |                                                                     |  |                                                                                      |  |                                                                                      |  |                           |
| Blood Tests                 | Abnormal                  | Normal     | Normal                                  | NA                          | Normal     | Normal                         | Normal                   | Normal                                     | Normal                                     | Normal                   | NA                                   | NA                                                                         | NA         | Normal                       | NA         | NA                                                       | NA             | Intermittently increased TSH | NA     | NA                             | NA     | NA                                                                  | NA         | NA                        | NA         | NA                      | NA         | NA                            | NA                | NA                        | NA                            | NA           | NA                        | NA                        | NA                       | NA       | NA          | NA       |                                      |  |                                                                     |  |                                                                                      |  |                                                                                      |  |                           |
| EEG                         | Abnormal (Hypsarrhythmia) | NA         | NA                                      | NA                          | NA         | Normal                         | Normal                   | Intermittent activity with slow background | Intermittent activity with slow background | Normal                   | Normal                               | Diffusely slow                                                             | Epileptic  | NA                           | NA         | Normal                                                   | Normal         | Normal                       | Normal | Normal                         | Normal | Normal                                                              | Normal     | Normal                    | Normal     | Normal                  | Normal     | Normal                        | Normal            | Normal                    | Normal                        | Normal       | Normal                    | Normal                    | Normal                   | Normal   | Normal      | Normal   | Normal                               |  |                                                                     |  |                                                                                      |  |                                                                                      |  |                           |
| Cognitive Delay*            | Severe                    | Severe     | Severe                                  | Severe                      | Severe     | Severe                         | Severe                   | Moderate                                   | Moderate                                   | Moderate                 | Severe                               | Severe                                                                     | Severe     | Moderate                     | Moderate   | Severe                                                   | Severe         | Severe                       | Severe | Severe                         | Severe | Severe                                                              | Severe     | Severe                    | Severe     | Severe                  | Severe     | Severe                        | Moderate          | Moderate                  | Moderate                      | Moderate     | Moderate                  | Moderate                  | Moderate                 | Moderate | Moderate    |          |                                      |  |                                                                     |  |                                                                                      |  |                                                                                      |  |                           |
| Dysmorphisms                | +                         | +          | +                                       | +                           | +          | +                              | +                        | +                                          | +                                          | +                        | +                                    | +                                                                          | +          | +                            | +          | +                                                        | +              | +                            | +      | +                              | +      | +                                                                   | +          | +                         | +          | +                       | +          | +                             | +                 | +                         | +                             | +            | +                         | +                         | +                        | +        | +           | +        |                                      |  |                                                                     |  |                                                                                      |  |                                                                                      |  |                           |
| Early Death                 | -                         | 20 Months  | -                                       | 5 Years (Due to infection)  | -          | -                              | -                        | -                                          | -                                          | -                        | -                                    | -                                                                          | -          | -                            | -          | -                                                        | -              | -                            | -      | -                              | -      | -                                                                   | -          | -                         | -          | -                       | -          | -                             | -                 | -                         | -                             | -            | -                         | -                         | -                        | -        | -           | -        |                                      |  |                                                                     |  |                                                                                      |  |                                                                                      |  |                           |
| Mutation                    | c.2563C>T<br>p.Arg855Ter  |            | c.3390G>A<br>IVS29-1G>A                 |                             |            | c.1488delT<br>p.Tyr497Thrfs*21 |                          | c.3860G>T<br>p.Trp1287Leu                  |                                            | c.1924C>T<br>p.Gln642Ter |                                      | mat:<br>c.302C>T<br>p.Arg1008Ter<br>del:<br>c.2629delC<br>p.Gln877Asnfs*16 |            | c.3056dupT<br>p.Leu1019fs*30 |            | mat:<br>c.4281C>A<br>p.Phe1427Leu<br>del:<br>c.4103-2T>C |                | c.3556C>T<br>p.Gln1186Ter    |        | c.2495dupA<br>p.Glu813Glyfs*23 |        | c.2889+1_dellAAGT<br>p.Val956_Leu963del<br>(24 bp deletion in cDNA) |            | c.4190C>T<br>p.Arg1384Ter |            | c.321G>A<br>p.Top107Ter |            | c.2758delA<br>p.Ile920Leufs*7 |                   | 4X_6M                     | c.2671delG<br>p.Val815Serfs*2 |              | 5Y_6M                     |                           | c.537delG<br>p.Trp179Ter |          | c.1267-2A>G |          | c.2022_2023delAT<br>p.Cys675Leufs*23 |  | mat:<br>c.110G>A<br>p.Trp377Ter<br>del:<br>c.2723C>T<br>p.Pro908Leu |  | mat:<br>c.3281G>A<br>P.Arg1094Gln<br>del:<br>c.2496_2497insTCATA<br>p.Phe833Hisfs*40 |  | mat:<br>c.3823C>T<br>p.Arg1275Ter<br>del:<br>c.2496_2497insTCATA<br>p.Phe833Hisfs*40 |  | c.3823C>T<br>p.Arg1275Ter |

Note: The extent of the severity of the symptoms marked by \* are results of our own interpretation of the information provided by the respective authors.
